# Supplementary material for: Restrictive diets are unnecessary for colonoscopy: Non-inferiority randomized trial
Source: PubMed Central journal article supplement — Endosc Int Open. 2024 Mar 7;12(3):E352–60. doi: 10.1055/a-2256-5356 (PMC10919995; doi:10.1055/a-2256-5356), 2024-03-07
Supplement: 10-1055-a-2256-5356_22664571.pdf.pdf [file 10-1055-a-2256-5356_22664571.pdf.pdf]

## Supplementary material

## Supplementary Table S1

Results of the Hatoum survey.

| Item                                                                                                         |                | Liberal diet | 1-day LRD  |
|--------------------------------------------------------------------------------------------------------------|----------------|--------------|------------|
| <b>How easy or difficult was it to consume the cleansing solution?</b>                                       | Very easy      | 46 (16.6)    | 44 (16)    |
|                                                                                                              | Easy           | 64 (23.1)    | 79 (28.7)  |
|                                                                                                              | Tolerable      | 121 (43.7)   | 115 (41.8) |
|                                                                                                              | Difficult      | 36 (13)      | 32 (11.6)  |
|                                                                                                              | Very difficult | 10 (3.6)     | 5 (1.8)    |
| <b>Were you able to consume the entire preparation as instructed?</b>                                        | Yes            | 263 (94.9)   | 264 (96)   |
|                                                                                                              | No             | 14 (5.1)     | 11 (4)     |
| <b>Please describe your overall experience of the study preparation:</b>                                     | Excellent      | 16 (5.8)     | 15 (5.5)   |
|                                                                                                              | Good           | 117 (42.2)   | 125 (45.5) |
|                                                                                                              | Fair           | 102 (36.8)   | 93 (33.8)  |
|                                                                                                              | Poor           | 29 (10.5)    | 34 (12.4)  |
|                                                                                                              | Bad            | 13 (4.7)     | 8 (2.9)    |
| <b>The taste of this study preparation (Pleinvue) was:</b>                                                   | Excellent      | 1 (0.4)      | 8 (2.9)    |
|                                                                                                              | Good           | 81 (29.3)    | 69 (25.1)  |
|                                                                                                              | Tolerable      | 116 (42)     | 128 (46.5) |
|                                                                                                              | Poor           | 50 (18.1)    | 50 (18.2)  |
|                                                                                                              | Bad            | 28 (10.1)    | 20 (7.3)   |
| <b>Would you ask your doctor for this preparation again if you needed another colonoscopy in the future?</b> | Yes            | 214 (77.3)   | 209 (76)   |
|                                                                                                              | No             | 63 (22.7)    | 66 (24)    |
| <b>Would you refuse the same cleansing solution again if it were to be prescribed to you in the future?</b>  | Yes            | 48 (17.4)    | 48 (17.5)  |
|                                                                                                              | No             | 228 (82.6)   | 227 (82.5) |

## Supplementary material

## Supplementary Table S2

Boston Bowel Preparation Score (BBPS) per segments and entry BBPS per segment.

| BBPS Score                       | Right colon  |             |                                     | Transverse colon |             |                                     | Left colon   |             |                                     |
|----------------------------------|--------------|-------------|-------------------------------------|------------------|-------------|-------------------------------------|--------------|-------------|-------------------------------------|
|                                  | Liberal diet | 1-day LRD   | Relative Risk (95% CI) <sup>†</sup> | Liberal diet     | 1-day LRD   | Relative Risk (95% CI) <sup>†</sup> | Liberal diet | 1-day LRD   | Relative Risk (95% CI) <sup>†</sup> |
| 3 - no. (%)                      | 189 (68%)    | 197 (71.6%) | 0.95 (0.85 - 1.06)                  | 211 (75.9%)      | 224 (81.5%) | 0.93 (0.85 - 1.02)                  | 193 (69.4%)  | 212 (77.1%) | 0.90 (0.81 - 1.00)                  |
| 2 - no. (%)                      | 79 (28.4%)   | 74 (26.9%)  | 1.32 (0.99 - 1.76)                  | 63 (22.7%)       | 49 (17.8%)  | 1.27 (0.91 - 1.78)                  | 80 (28.8%)   | 61 (22.2%)  | 1.30 (0.97 - 1.73)                  |
| 1 - no. (%)                      | 8 (2.9%)     | 3 (1.1%)    | 2.64 (0.71 - 9.84)                  | 2 (0.7%)         | 2 (0.7%)    | 0.99 (0.14 - 6.97)                  | 3 (1.1%)     | 2 (0.7%)    | 1.48 (0.25 - 8.81)                  |
| 0 - no. (%)                      | 2 (0.7%)     | 1 (0.4)     | 1.98 (0.18 - 21.69)                 | 2 (0.7%)         | 0 (0%)      | NA                                  | 2 (0.7%)     | 0 (0%)      | NA                                  |
| N° of patients with missing data | 0            | 0           | 0                                   | 0                | 0           | 0                                   | 0            | 0           | 0                                   |

<sup>†</sup> The confidence intervals for the secondary outcomes have not been corrected for multiple comparisons, and no clinical conclusions can be drawn from these data.

## Supplementary material

## Supplementary Table S3

*Entry* Boston Bowel Preparation Score (BBPS) per segment.

| Entry BBPS Score                 | Right colon  |             |                                     | Transverse colon |             |                                     | Left colon   |             |                        |
|----------------------------------|--------------|-------------|-------------------------------------|------------------|-------------|-------------------------------------|--------------|-------------|------------------------|
|                                  | Liberal diet | 1-day LRD   | Relative Risk (95% CI) <sup>†</sup> | Liberal diet     | 1-day LRD   | Relative Risk (95% CI) <sup>†</sup> | Liberal diet | 1-day LRD   | Relative Risk (95% CI) |
| 3 - no. (%)                      | 86 (30.9%)   | 77 (28%)    | 0.95 (0.85 - 1.06)                  | 126 (45.3%)      | 122 (44.4%) | 1.02 (0.85 - 1.23)                  | 118 (42.4%)  | 101 (36.7%) | 1.1 (0.90 - 1.35)      |
| 2 - no. (%)                      | 150 (54%)    | 172 (62.5%) | 1.05 (0.81 - 1.38)                  | 129 (46.4%)      | 134 (48.7%) | 0.95 (0.80 - 1.13)                  | 131 (47.1%)  | 152 (55.3%) | 0.85 (0.72 - 1.00)     |
| 1 - no. (%)                      | 37 (13.3%)   | 25 (9.1%)   | 2.64 (0.71 - 9.84)                  | 18 (6.5%)        | 19 (6.9%)   | 0.94 (0.5 - 1.75)                   | 24 (8.6%)    | 22 (8%)     | 1.08 (0.62 - 1.88)     |
| 0 - no. (%)                      | 5 (1.8%)     | 1 (0.4%)    | 1.98 (0.18 - 21.69)                 | 5 (1.8%)         | 0 (0%)      | NA                                  | 5 (1.8%)     | 0 (0%)      | NA                     |
| N° of patients with missing data | 0            | 0           | 0                                   | 0                | 0           | 0                                   | 0            | 0           | 0                      |

<sup>†</sup> The confidence intervals for the secondary outcomes have not been corrected for multiple comparisons, and no clinical conclusions can be drawn from these data.

## Supplementary material

## Supplementary Table S4

Additional non-inferiority analysis.

| Primary Outcome                                          | Liberal diet     | 1-day LRD        | p-value | Non-inferiority risk difference § | One-sided 95%CI § | RR (95%CI)         | N° of patients with missing data |
|----------------------------------------------------------|------------------|------------------|---------|-----------------------------------|-------------------|--------------------|----------------------------------|
| PP analysis. Adequate cleansing - no. (%) n=469          | 239 / 249 (96)   | 216 / 220 (98.2) | 0.05    | 2.20                              | 5.00              | 0.98 (0.95 - 1.01) | 0                                |
| As treated analysis. Adequate cleansing - no. (%) n= 545 | 261 / 272 (95.9) | 267 / 273 (97.8) | 0.03    | 1.85                              | 4.61              | 0.98 (0.95 - 1.01) | 8                                |
| ITT <i>Entry</i> adequate cleansing - no. (%) n= 553     | 232 / 278 (83.4) | 238 / 275 (86.5) | 0.30    | 3.09                              | 8.09              | 0.96 (0.90 - 1.03) | 0                                |

## Supplementary material

## 1-day LRD dietary instructions

**LOW RESIDUE DIET**

**You cannot take: vegetables, fruit, legumes, nuts and whole foods.**

- This diet is specially designed to cleanse the intestine and must be done correctly the day before the colonoscopy. You cannot eat or drink anything that is not included in the diet.
- This diet can be followed by patients with diabetes, high cholesterol, or hypertension.

| <b>CLEAR LIQUIDS (1.5 - 2 liters)</b>                                                                                                                                                       |                                                                                                                                                                                                                                                                                                                                                                                                                                                                                                               | <b>NON-WHOLEMEAL BREAD</b>                          |
|---------------------------------------------------------------------------------------------------------------------------------------------------------------------------------------------|---------------------------------------------------------------------------------------------------------------------------------------------------------------------------------------------------------------------------------------------------------------------------------------------------------------------------------------------------------------------------------------------------------------------------------------------------------------------------------------------------------------|-----------------------------------------------------|
| Water, fruit juices without pulp (apple, grape or blueberry), strained vegetable broth, coffee, tea or infusions with sugar or sweetener, isotonic drinks (Isostar, Aquarius, Gatorade...). |                                                                                                                                                                                                                                                                                                                                                                                                                                                                                                               | Biscuit type toast<br>either<br>toasted white bread |
| <b>BREAKFAST</b>                                                                                                                                                                            | <p style="text-align: center;"><b>To choose between these two options:</b></p> <p>a) 10 g of butter (1 tablet) + 1 tablespoon of honey or jam<br/>b) 1 hard-boiled or scrambled egg or omelet or 30 g of sweet ham or turkey (1 thin slice).<br/>This option is preferable in diabetic patients.</p> <p>- 2-3 biscuits or 40 g of toasted white bread (2 slices as sliced bread)<br/>- Fruit juice without pulp (apple, grape, blueberry).<br/>- Coffee or tea and ½ cup of skimmed or semi-skimmed milk.</p> |                                                     |
| <b>MID MORNING SNACK</b>                                                                                                                                                                    | Fruit juice without pulp (apple, grape, blueberry), coffee, tea or infusions and ½ cup of milk.                                                                                                                                                                                                                                                                                                                                                                                                               |                                                     |
| <b>MEAL</b>                                                                                                                                                                                 | <p>- Vegetable broths.<br/>- White rice or pasta: 30g raw or 100g cooked (once cooked, it is the amount that fits in a full ladle) or 100g of potato. It can be seasoned with oil or butter.<br/>- Chicken, turkey or white fish: 100g, boiled, or baked or microwaved with a little oil (1 small dessert spoon).<br/>- Biscuits: 1 or 2 slices<br/>- Gelatin: 1 unit<br/>- Coffee, tea or infusion</p>                                                                                                       |                                                     |
| <b>AFTERNOON SNACK</b>                                                                                                                                                                      | Fruit juice without pulp (apple, grape or blueberry).                                                                                                                                                                                                                                                                                                                                                                                                                                                         |                                                     |

**THE NIGHT BEFORE THE COLONOSCOPY**

- Vegetable broths
- Apple juice
- Infusion with sugar or sweetener
- Water
- Aquarius

- **On the day of the colonoscopy, you will be only allowed to drink the cleansing solution and clear liquids up to 2 hours before the colonoscopy. Milk is NOT a clear liquid.**

## Supplementary material

## Liberal diet instructions

**No diet or Liberal diet**

- You can follow a diet without any special dietary restrictions, the idea is to follow your usual day-to-day diet.
- Please note that it is recommended to avoid heavy or excessive meals outside of your usual routine the day before the colonoscopy.
- You will need to have a light dinner with a liquid diet as proposed in the chart because you are starting the intake of the cleansing solution for the colonoscopy.
- You must fast for 8 hours, except for the cleansing solution and clear liquids, which should be completed at least 2 hours before the examination (ideally between 2 and 3 hours before).

| <b>THE NIGHT BEFORE THE COLONOSCOPY</b>                                                                                                                          |
|------------------------------------------------------------------------------------------------------------------------------------------------------------------|
| <ul style="list-style-type: none"><li>-Vegetable broth</li><li>-Apple juice</li><li>-Infusion with sugar or sweetener</li><li>-Water</li><li>-Aquarius</li></ul> |

**On the day of the colonoscopy, you will be only allowed to drink the cleansing solution and clear liquids up to 2 hours before the colonoscopy. Milk is NOT a clear liquid.**
